# Supplementary material for: Race, Neighborhood Disadvantage, and Prehospital Law Enforcement Handcuffing in Children With Behavioral Health Emergencies
Source: PubMed Central journal article supplement (PMC11555546; doi:10.1001/jamanetworkopen.2024.43673), 2024-11-11

## Supplementary Online Content

Watkins K, Glomb NW, Trivedi TK, et al. Race, neighborhood disadvantage, and prehospital law enforcement handcuffing in children with behavioral health emergencies. *JAMA Netw Open*. 2024;7(11):e2443673. doi:10.1001/jamanetworkopen.2024.43673

**eMethods.** Identifying the Primary Outcome, Handcuffing

**eTable 1.** Unique Patient Visits With Race

**eTable 2.** Sensitivity Analyses Using First Encounter, Missing Included as White & Random Assignment: Association of Race, Area Deprivation Index (ADI), Sex, and Age on Handcuffing Outcome

**eFigure.** N-gram Data Linkage Process

This supplementary material has been provided by the authors to give readers additional information about their work.

### **eMethods. Identifying the Primary Outcome, Handcuffing**

An initial emergency physician reviewer (T.T.) manually read all paramedic narratives that contained the term “cuff” in them ( $N = 812$ ). In these manually reviewed encounters, the term “handcuff” was used in a positive sense (“the patient was handcuffed”,  $N = 767$ ) and in a negative sense (“the patient was not handcuffed,”  $N = 45$ ). Encounters with narratives that did not contain the term “cuff” ( $N = 9,659$ ) were not manually reviewed during this phase; these encounters were automatically coded as negative for handcuffing.

Interrater reliability was assessed for the coding of handcuff use by EMS using Cohen's Kappa coefficient. To validate the coding scheme and algorithm developed by the initial reviewer (T.T.), 2 additional raters (a pediatric emergency physician, S.L., and a pediatric psychologist, M.R.) were trained on using the simple coding scheme (“0” for no handcuff application and “1” for handcuff application) during a bimonthly research group meeting. The 2 additional reviewers (S.L. and M.R.) independently evaluated a 20% sample ( $N = 2100$ ) of all BHE encounters ( $N = 10,471$ ) and coded for the presence or absence of handcuffs. Additional reviewer responses were compared to the initial reviewer responses.

| <b>eTable 1. Unique Patient Visits with Race</b>                       |                                           |
|------------------------------------------------------------------------|-------------------------------------------|
| <b>Characteristic</b>                                                  | <b>Unique Patient Visits (%), N=3,938</b> |
| Asian                                                                  | 458 (11.6)                                |
| Black                                                                  | 1 035 (26.3)                              |
| Hispanic <sup>a</sup>                                                  | 502 (12.8)                                |
| Other                                                                  | 1 066 (27.1)                              |
| White                                                                  | 877 (22.2)                                |
| <sup>a</sup> Hospital records listed Hispanic ethnicity absent of race |                                           |

**eTable 2. Sensitivity Analyses using First Encounter, Missing Included as White & Random Assignment: Association of Race, Area Deprivation Index (ADI), Sex, and Age on Handcuffing Outcome**

| Characteristic                                   | Adjusted Model*<br>Handcuffing, OR (95% CI) |
|--------------------------------------------------|---------------------------------------------|
| <b>Missing Race replaced as White</b>            |                                             |
| <b>Race and Ethnicity</b><br>(reference = White) |                                             |
| Asian                                            | 0.26 (0.12-0.60)                            |
| Black                                            | 1.50 (1.12-2.02)                            |
| Hispanic                                         | 0.68 (0.42-1.10)                            |
| Other                                            | 0.90 (0.65-1.27)                            |
| Characteristic                                   | Adjusted Model*<br>Handcuffing, OR (95% CI) |
| <b>Missing Race replaced as Random Race</b>      |                                             |
| <b>Race and Ethnicity</b><br>(reference = White) |                                             |
| Asian                                            | 0.98 (0.64-1.50)                            |
| Black                                            | 1.48 (1.04-2.11)                            |
| Hispanic <sup>a</sup>                            | 1.09 (0.72-1.64)                            |
| Other <sup>b</sup>                               | 1.13 (0.79-1.64)                            |
| <b>ADI Category<sup>c</sup></b>                  |                                             |
| I (lowest disadvantage)                          | Reference                                   |
| II                                               | 1.60 (1.22-2.11)                            |
| III (highest disadvantage)                       | 2.29 (1.68-3.12)                            |

\*Final Model was adjusted for all other variables including age, sex, and ADI Category

<sup>a</sup>Hospital records listed Hispanic ethnicity absent of race

<sup>b</sup>Amerasian, Arab-American, Guamanian, Hawaiian, Native-American, Other Non-White, Pacific Islander, and Russian, Samoan

<sup>c</sup>Area Deprivation Index: Decile-based rank based on neighborhood-level characteristics from housing quality, education, employment, and income domains; Rank ranges from 1 to 10, 1= lowest neighborhood disadvantage & 10 = highest neighborhood disadvantage;

ADI I = ranking 1-3= lowest neighborhood disadvantage, ADI II = ranking 4-6, ADI III = ranking 7-10=highest neighborhood disadvantage

eFigure. N-gram Data Linkage Process

## Phase 1 Data Identifiable

## Phase 2 Merge Process (Single Day Process)

## Phase 3 Final Dataset Not Identifiable

Alameda  
County EMS



UCSF Benioff



Willow Rock

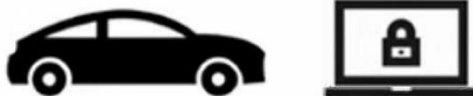

1) 2 Databases are Linked by Date of Birth and Name

| Records in the EMS Database |               | Records in the Willow Rock/UCSF Database to be Merged |               |       |
|-----------------------------|---------------|-------------------------------------------------------|---------------|-------|
| Name                        | Date of Birth | Date of Birth                                         | Name          | Race  |
| John Deering                | 1/1/2000      | 1/1/2000                                              | John Deerings | White |
| Jane Doe                    | 12/12/2012    | 12/12/2012                                            | Jane Deer     | Black |
| Tarak Trivedi               | 6/6/2004      | 6/6/2004                                              | Joshua Brown  | Asian |

2) Two Databases are joined by Date of Birth, creating a database of possible matches

| Date of Birth | Name (EMS data) | Name (Merged Data) | Potential Race | Similarity Score* |
|---------------|-----------------|--------------------|----------------|-------------------|
| 1/1/2000      | John Deering    | John Deerings      | White          | 0.95              |
| 12/12/2012    | Jane Doe        | Jane Deer          | Black          | 0.43              |
| 6/6/2004      | Tarak Trivedi   | Joshua Brown       | Asian          | 0                 |

3) Only records with Similarity Scores\* > 0.6 are considered matches, and Random Identifier Assigned

| Date of Birth | Random Identifier | Name (EMS data) | Name (Merged Data) | Merged Race |
|---------------|-------------------|-----------------|--------------------|-------------|
| 1/1/2000      | #14578            | John Deering    | John Deerings      | White       |

4) Unique Identifier Added, and Names/Dates-of-Birth Permanently Deleted from Database

| Random Identifier | Merged Race |
|-------------------|-------------|
| #14578            | White       |

\*The N-gram method provides a way to algorithmically quantify the similarity exhibited by two strings. The cut-offs were very stringent, requiring a similarity score of 0.6 or higher to be considered a match

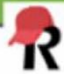

Supplement: jamanetwopen-e2443673-s001.pdf [file jamanetwopen-e2443673-s001.pdf]
