# Supplementary material for: Race, Neighborhood Disadvantage, and Prehospital Law Enforcement Handcuffing in Children With Behavioral Health Emergencies
Source: PubMed Central journal article supplement (PMC11555546; doi:10.1001/jamanetworkopen.2024.43673), 2024-11-11
Supplement: jamanetwopen-e2443673-s002.pdf [file jamanetwopen-e2443673-s002.pdf]

## Data Sharing Statement

Watkins. Race, Neighborhood Disadvantage, and Prehospital Law Enforcement Handcuffing in Children With Behavioral Health Emergencies. *JAMA Netw Open*. Published November 11, 2024. doi:10.1001/jamanetworkopen.2024.43673

### Data

**Data available:** No
